# Supplementary material for: Photo-isomerization and light-modulated aggregation behavior of azobenzene-based ionic liquids in aqueous solutions
Source: Royal Society of Chemistry journal article supplement (doi:10.1039/c7ra08419f), 2017-01-01
Supplement: c7ra08419f1.pdf [file c7ra08419f1.pdf]

## Photo-isomerization and light-modulated aggregation behavior of azobenzene-based ionic liquids in aqueous solutions

Zhiyong Li<sup>a,b</sup>, Huiyong Wang<sup>a,b</sup>, Mengen Chu<sup>a,b</sup>, Pengxin Guan<sup>a,b</sup>, Yang Zhao<sup>a,b</sup>, Yuling Zhao<sup>a,b</sup>, Jianji Wang<sup>\*,a,b</sup>

<sup>a</sup> Collaborative Innovation Center of Henan Province for Green Manufacturing of Fine Chemicals, Key Laboratory of Green Chemical Media and Reactions, Ministry of Education, School of Chemistry and Chemical Engineering, Henan Normal University, Xinxiang, Henan 453007, P. R. China

<sup>b</sup> Henan Key Laboratory of Green Chemistry, Henan Normal University, Xinxiang, Henan 453007, P. R. China

\* E-mail: jwang@htu.cn

### <sup>1</sup>H NMR spectrum of the azobenzene-based ionic liquids

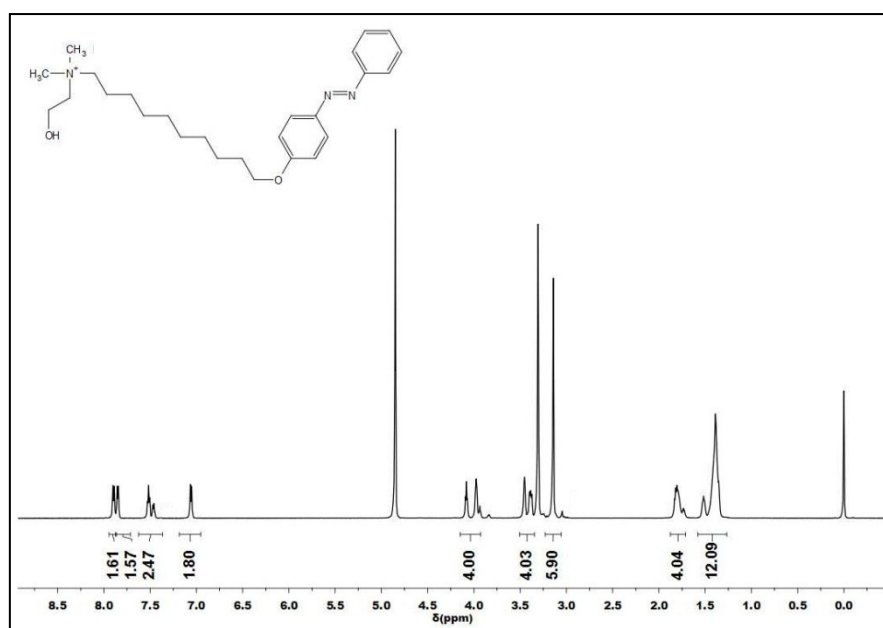

Figure S1. <sup>1</sup>H NMR spectrum of ChoC<sub>10</sub>Azo

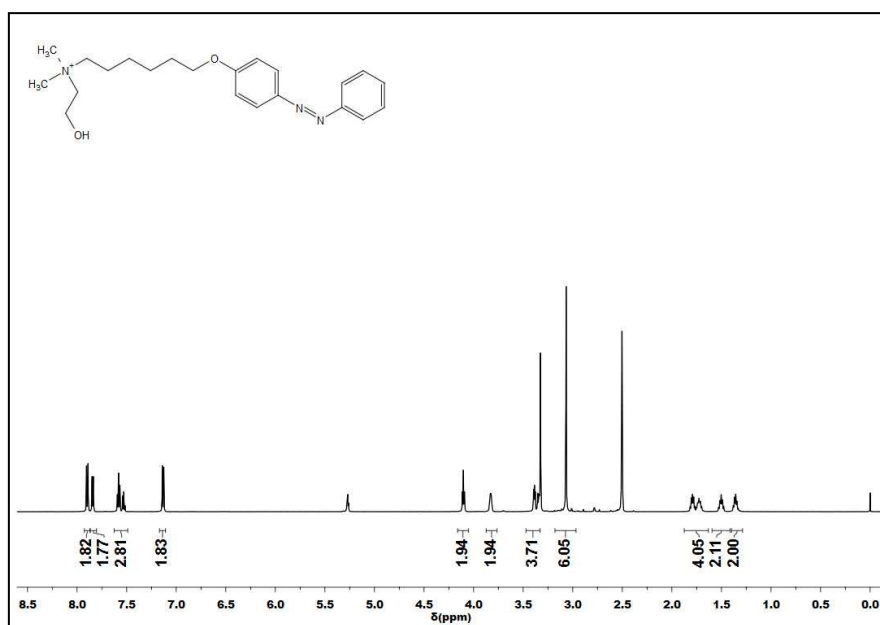

Figure S2. <sup>1</sup>H NMR spectrum of ChoC<sub>6</sub>Azo

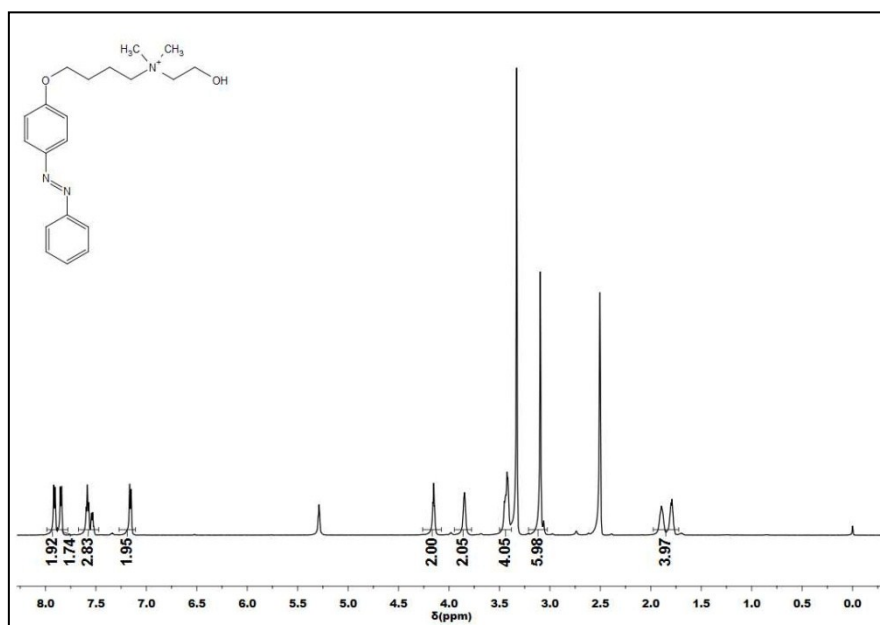

Figure S3. <sup>1</sup>H NMR spectrum of ChoC<sub>4</sub>Azo

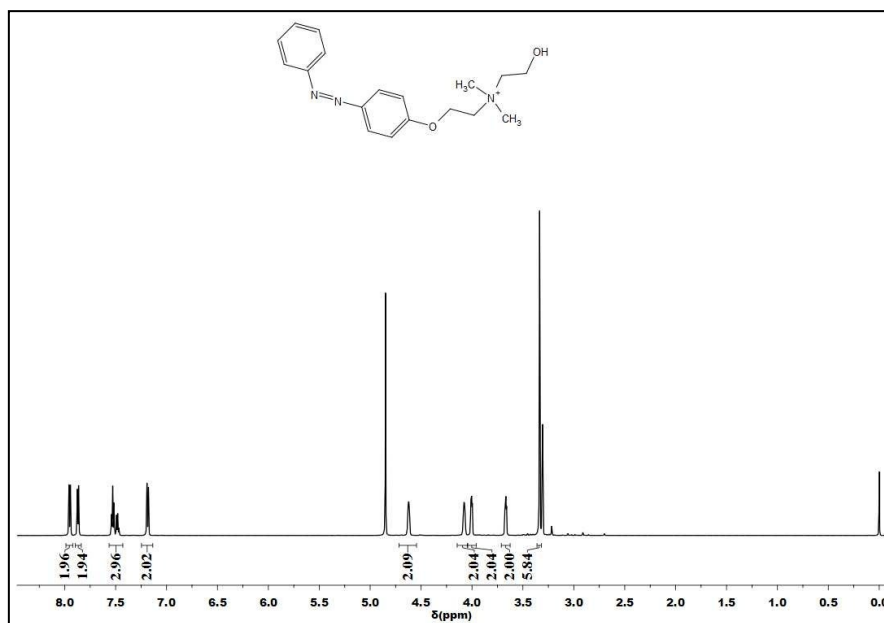

Figure S4.  $^1\text{H}$  NMR spectrum of ChoC<sub>2</sub>Azo

#### $^1\text{H}$ NMR data of the azobenzene-based ionic liquids

**1. ChoC<sub>10</sub>Azo**,  $^1\text{H}$  NMR (400MHz, CD<sub>3</sub>OD):  $\delta$  = 8.04 (d, 2H), 7.87 (d, 2H), 7.65 (m, 3H), 7.15 (d, 2H), 4.17 (m, 4H), 3.54 (m, 4H), 3.23 (s, 6H), 1.89 (m, 4H), 1.61 (m, 12H) ppm.

**2. ChoC<sub>6</sub>Azo**,  $^1\text{H}$  NMR (400MHz, DMSO-*d*<sub>6</sub>):  $\delta$  = 7.93 (d, 2H), 7.87 (d, 2H), 7.62 (m, 3H), 7.17 (d, 2H), 4.16 (t, 2H), 3.87 (s, 2H), 3.41 (m, 4H), 3.18 (s, 6H), 1.88 (m, 4H), 1.59 (m, 2H), 1.40 (m, 2H) ppm.

**3. ChoC<sub>4</sub>Azo**,  $^1\text{H}$  NMR (400MHz, DMSO-*d*<sub>6</sub>):  $\delta$  = 7.98 (d, 2H), 7.88 (d, 2H), 7.67 (m, 3H), 7.27 (d, 2H), 4.26 (t, 2H), 3.95 (s, 2H), 3.50 (m, 4H), 3.21 (s, 6H), 1.98 (m, 4H) ppm.

**4. ChoC<sub>2</sub>Azo**,  $^1\text{H}$  NMR (400MHz, CD<sub>3</sub>OD):  $\delta$  = 7.99 (d, 2H), 7.90 (d, 2H), 7.56 (m, 3H), 7.25 (d, 2H), 4.72 (t, 2H), 4.15 (t, 2H), 4.05 (t, 2H), 3.71 (t, 2H), 3.36 (s, 6H) ppm.

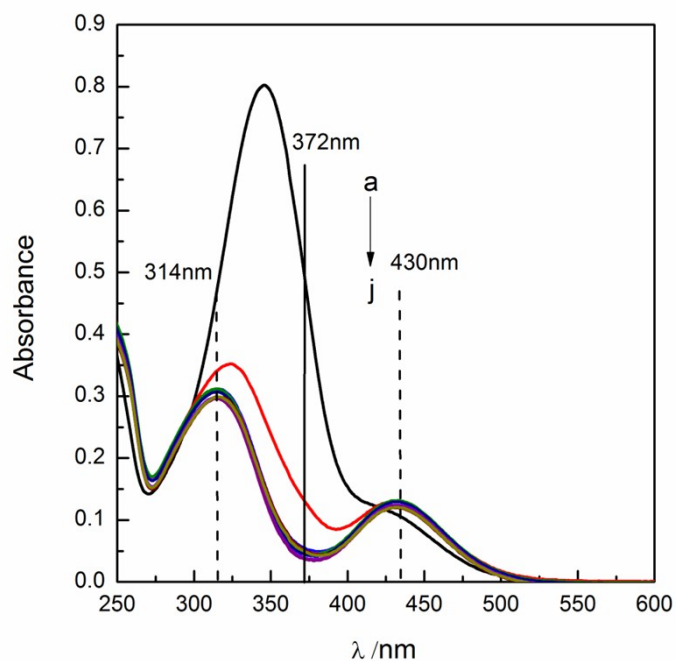

Figure S5. UV-vis spectra of aqueous solution of 0.055mM ChoC<sub>6</sub>Azo after different UV irradiation time at 25.0°C: a, initial state; b, 1s; c, 2s; d, 5s; e, 10s; f, 30s; g, 60s; h, 300s; i, 600s; j, 1800s.

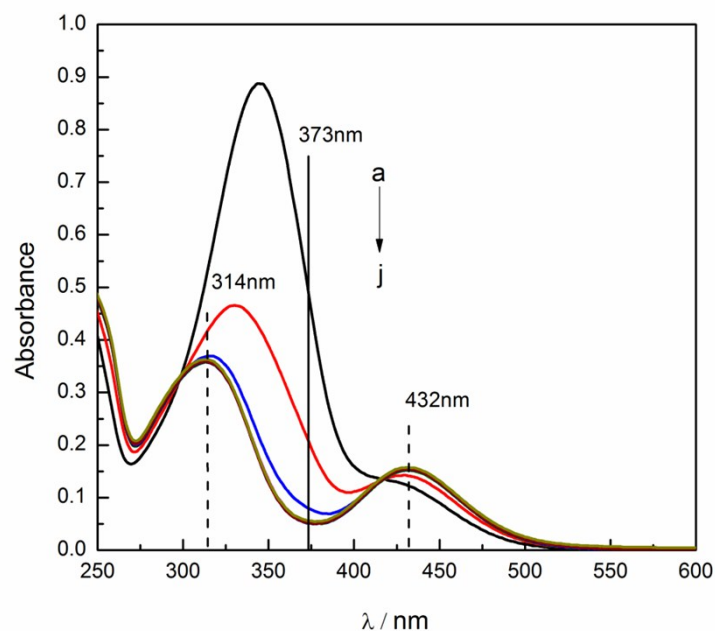

Figure S6. UV-vis spectra of aqueous solution of 0.055mM ChoC<sub>4</sub>Azo after different UV irradiation time at 25.0°C: a, initial state; b, 1s; c, 2s; d, 5s; e, 10s; f, 30s; g, 60s; h, 300s; i, 600s; j, 1800s.

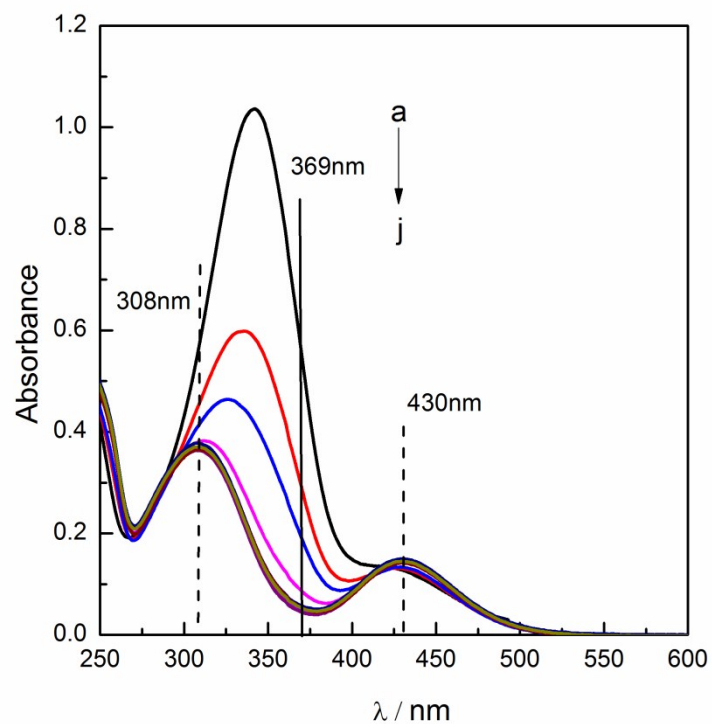

Figure S7. UV-vis spectra of aqueous solution of 0.055mM ChoC<sub>2</sub>Azo after different UV irradiation time at 25.0°C: a, initial state; b, 1s; c, 2s; d, 5s; e, 10s; f, 30s; g, 60s; h, 300s; i, 600s; j, 1800s.

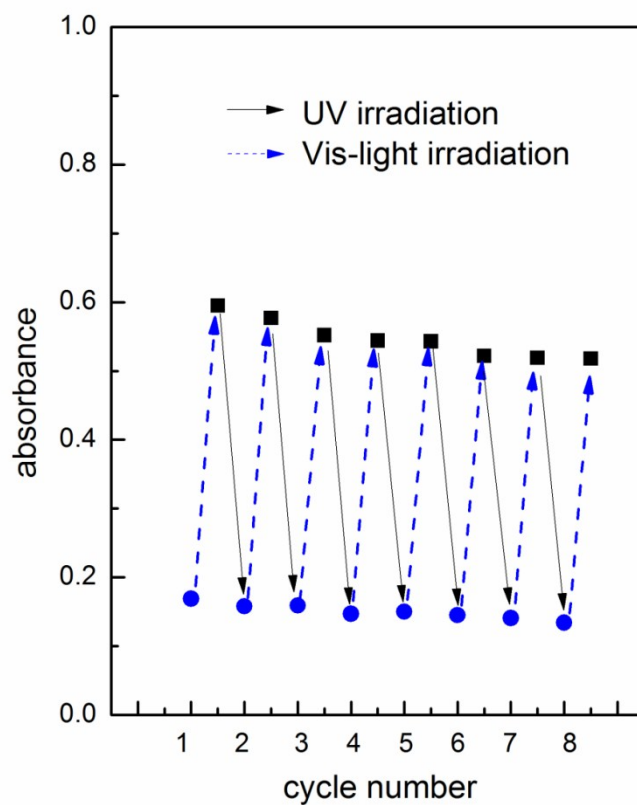

Figure S8. Changes of absorbance values at 344 nm for 8 cycles at 25.0°C.
